# Supplementary material for: Complexity of cardiac signals for predicting changes in alpha-waves after stress in patients undergoing cardiac catheterization
Source: PubMed Central journal article supplement (PMC4541158; doi:10.1038/srep13315), 2015-08-19
Supplement: srep13315-s1.pdf [file srep13315-s1.pdf]

**Complexity of cardiac signals for predicting changes in alpha-waves after stress in patients  
undergoing cardiac catheterization**

**Supplementary Information**

Hung-Chih Chiu<sup>1,\*</sup>, Yen-Hung Lin<sup>2,\*</sup>, Men-Tzung Lo<sup>3,4</sup>, Sung-Chun Tang<sup>6</sup>, Tzung-Dau Wang<sup>2</sup>,  
Hung-Chun Lu<sup>2</sup>, Yi-Lwun Ho<sup>2</sup>, Hsi-Pin Ma<sup>1</sup> & Chung-Kang Peng<sup>4,5</sup>

<sup>1</sup>Department of Electrical Engineering, National Tsing Hua University, Hsinchu, Taiwan.

<sup>2</sup>Department of Internal Medicine, National Taiwan University Hospital and National Taiwan  
University College of Medicine, Taipei, Taiwan.

<sup>3</sup>Institute of Translational and Interdisciplinary Medicine and Department of Biomedical Sciences and  
Engineering, National Central University, Chungli, Taiwan

<sup>4</sup>Research Center for Adaptive Data Analysis, National Central University, Taoyuan, Taiwan.

<sup>5</sup>Division of Interdisciplinary Medicine and Biotechnology, Beth Israel Deaconess Medical  
Center/Harvard Medical School, Boston, Massachusetts, USA.

<sup>6</sup>Department of Neurology, National Taiwan University Hospital and National Taiwan University  
College of Medicine, Taipei, Taiwan.

**Supplementary Table S1 | Classification of patients on the basis of the pretest variables and the difference between pre- and post-test variables.**

|     |                     |            |                                                                                                                                                     |
|-----|---------------------|------------|-----------------------------------------------------------------------------------------------------------------------------------------------------|
| ECG | Linear Variable     | Pre-Test   | meanNN, Log-meanNN,<br>sdNN, Log-sdNN,<br>pNN20, Log-pNN20,<br>pNN50, Log-pNN50,<br>rMMSD, Log-rMMSD,<br>LF, Log-LF, HF, Log-HF<br>LF/HF, Log-LF/HF |
|     |                     | Difference | meanNN, Log-meanNN,<br>sdNN, Log-sdNN,<br>pNN20, Log-pNN20,<br>pNN50, Log-pNN50,<br>rMMSD, Log-rMMSD,<br>LF, Log-LF, HF, Log-HF<br>LF/HF, Log-LF/HF |
|     | Non-linear Variable | Pre-Test   | Slope1-5, Slope6-20,<br>Area1-5, Log_Area1-5,<br>Area6-20, Log_Area6-20<br>$\alpha_1$ , Log_ $\alpha_1$ , $\alpha_2$ , Log_ $\alpha_2$              |
|     |                     | Difference | Slope1-5, Slope6-20,<br>Area1-5, Log_Area1-5,<br>Area6-20, Log_Area6-20<br>$\alpha_1$ , Log- $\alpha_1$ , $\alpha_2$ , Log- $\alpha_2$              |
| EEG | Linear Variable     | Pre-Test   | Alpha activity                                                                                                                                      |
|     |                     | Difference | Alpha activity                                                                                                                                      |

|                  |                                                                                                                             |
|------------------|-----------------------------------------------------------------------------------------------------------------------------|
| Clinical Data    | Age, Gender, BMI, MBP(Pre-Test), MBP(Difference), Treatment, Smoking, Diabetes Mellitus, Hyperlipidemia, Hypertension, EGFR |
| Neurotransmitter | Serotonin, Orphanin_FQ, Dopamine                                                                                            |

| Supplementary Table S2   Classification of patients according to Spearman's rank correlation. |                                                                                                                                                             |            |                                                                     |
|-----------------------------------------------------------------------------------------------|-------------------------------------------------------------------------------------------------------------------------------------------------------------|------------|---------------------------------------------------------------------|
| ECG                                                                                           | Linear Variable                                                                                                                                             | Pre-Test   | meanNN,<br>sdNN, Log-sdNN,<br>pNN20, Log-pNN20,<br>LF/HF, Log-LF/HF |
|                                                                                               |                                                                                                                                                             | Difference | meanNN,<br>pNN20, Log_pNN20,<br>rMMSD,<br>LF/HF, Log_LF/HF          |
|                                                                                               | Non-linear Variable                                                                                                                                         | Pre-Test   | Slope1-5,<br>Area1-5, Log-Area1-5,<br>$\alpha_1, \alpha_2$          |
|                                                                                               |                                                                                                                                                             | Difference | Slope1-5,<br>Area1-5, Log-Area1-5,<br>$\alpha_1, \alpha_2$          |
| EEG                                                                                           | Linear Variable                                                                                                                                             | Pre-Test   | Alpha activity                                                      |
|                                                                                               |                                                                                                                                                             | Difference | Alpha activity                                                      |
| Clinical Data                                                                                 | Age, Gender, BMI, MBP(Pre-Test), MBP(Difference), Treatment, Smoking, Diabetes Mellitus, Hyperlipidemia, Hypertension, estimated glomerular filtration rate |            |                                                                     |
| Neurotransmitter                                                                              | Serotonin, Orphanin_FQ, Dopamine                                                                                                                            |            |                                                                     |

**Supplementary Table S3 | Classification of methods by using GAMs.**

|     |                     |            |                                                                                                                                                                                                                                                                                                      |
|-----|---------------------|------------|------------------------------------------------------------------------------------------------------------------------------------------------------------------------------------------------------------------------------------------------------------------------------------------------------|
| ECG | Linear Variable     | Pre-Test   | $3.816 \leq \text{Log\_sdNN} \leq 5.115,$<br>$0.017 \leq \text{pNN50} \leq 0.176,$<br>$56.598 \leq \text{rMSSD} \leq 194.443,$<br>$3.81 \leq \text{Log\_rMSSD} \leq 5.348,$<br>$1071.873 \leq \text{HF} \leq 13485.712,$<br>$1.229 \leq \text{LF/HF} \leq 1.98,$                                     |
|     |                     | Difference | $\text{Log\_sdNN} \leq -0.415,$<br>$-0.164 \leq \text{pNN20} \leq 0.007,$<br>$-0.142 \leq \text{pNN50} \leq 0.007,$<br>$-105.641 \leq \text{rMSSD} \leq 4.677,$<br>$\text{LF} \leq 156.425 \text{ and } \text{LF} \geq 13413.356,$<br>$\text{HF} \leq 376.933 \text{ and } \text{HF} \geq 25327.388$ |
|     | Non-linear Variable | Pre-Test   | $0.01 \leq \text{Slope6} - 20,$<br>$\text{Log\_Area1} - 5 \leq 1.007,$<br>$2.183 \leq \text{Log\_Area6} - 20 \leq 2.895,$<br>$0.425 \leq \alpha_1 \leq 0.756,$<br>$\alpha_2 \leq 0.737 \text{ and } \alpha_2 \geq 0.876$                                                                             |
|     |                     | Difference | $\text{Area1} - 5 \leq -1.247 \text{ and } \text{Area1} - 5 \geq 0.809,$<br>$\text{Log\_Area6} - 20 \leq -0.042 \text{ and } \text{Log\_Area6} - 20 \geq 0.5$                                                                                                                                        |

**Supplementary Table S4 | Experimental results of the HRV analysis before *treatment*, obtained using Spearman's rank correlation.**

|                  | sdNN   | Log-sdNN | pNN50  | Log-pNN50 | rMMSD  | Log-rMMSD | LF     | Log-LF | LF/HF  | Log-LF/HF |
|------------------|--------|----------|--------|-----------|--------|-----------|--------|--------|--------|-----------|
| pNN50            | 0.9157 | 0.9157   |        |           |        |           |        |        |        |           |
| Log- pNN50       | 0.9157 | 0.9157   |        |           |        |           |        |        |        |           |
| rMMSD            | 0.9129 | 0.9129   | 0.8638 | 0.8638    |        |           |        |        |        |           |
| Log-rMMSD        | 0.9129 | 0.9129   | 0.8638 | 0.8638    |        |           |        |        |        |           |
| LF               | 0.8364 | 0.8364   |        |           | 0.845  | 0.845     |        |        |        |           |
| Log-LF           | 0.8364 | 0.8364   |        |           | 0.845  | 0.845     |        |        |        |           |
| HF               | 0.8151 | 0.8151   |        |           | 0.9092 | 0.9092    | 0.9487 | 0.9487 |        |           |
| Log-HF           | 0.8151 | 0.8151   |        |           | 0.9092 | 0.9092    | 0.9487 | 0.9487 |        |           |
| $\alpha_1$       |        |          |        |           |        |           |        |        | 0.8331 | 0.8331    |
| Log-- $\alpha_1$ |        |          |        |           |        |           |        |        | 0.8331 | 0.8331    |

**Supplementary Table S5 | Experimental results regarding the difference between the pre- and posttest variables obtained using Spearman's rank correlation**

|            | sdNN   | Log-sdNN | LF     | Log-LF | LF/HF  |
|------------|--------|----------|--------|--------|--------|
| rMMSD      | 0.8979 | 0.8564   |        |        |        |
| Log- rMMSD | 0.8320 | 0.8760   |        |        |        |
| HF         |        |          | 0.9486 |        |        |
| Log-HF     |        |          |        | 0.9405 |        |
| Log-LF/HF  |        |          |        |        | 0.9782 |

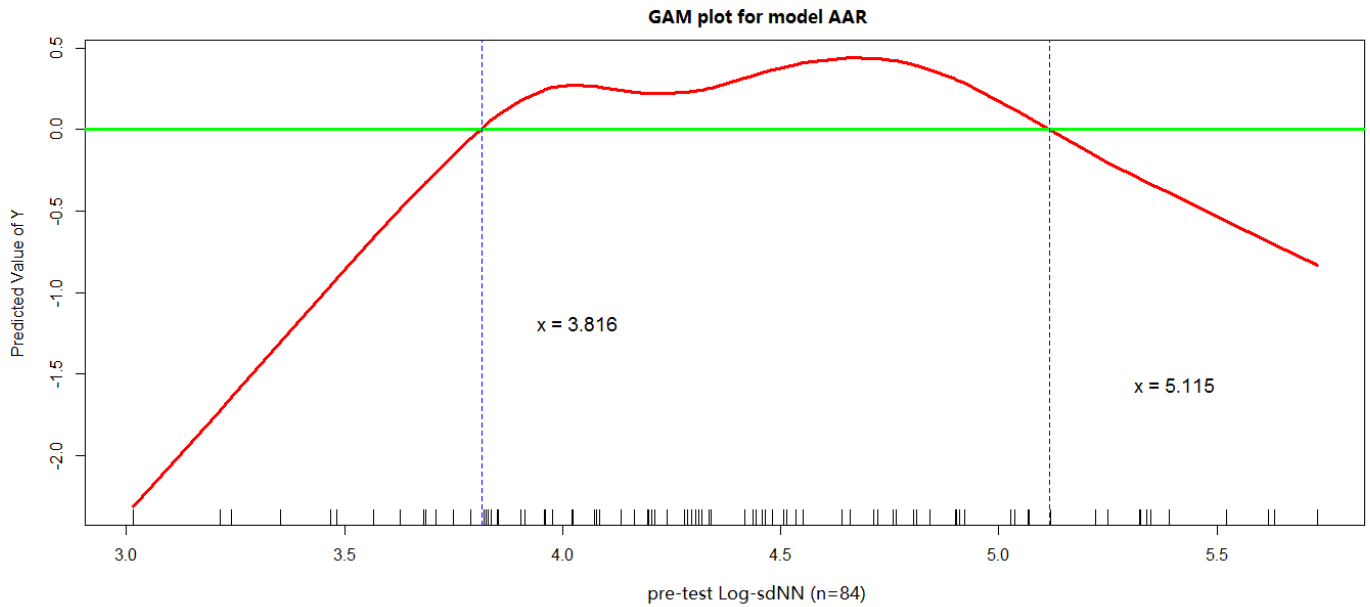

**Supplementary Figure S1: GAM plot for modeling the relationship between the change in the alpha wave and pretest log-sdNN.** The vertical axis represents the difference in alpha activity. The horizontal axis represents the pretest log-sdNN and number of patients. GAM techniques can be used to show that

$$\text{pre-test Log-sdNN} = \begin{cases} 1, & 3.816 \leq \text{Log-sdNN} \leq 5.115 \\ 0, & \text{others} \end{cases}$$

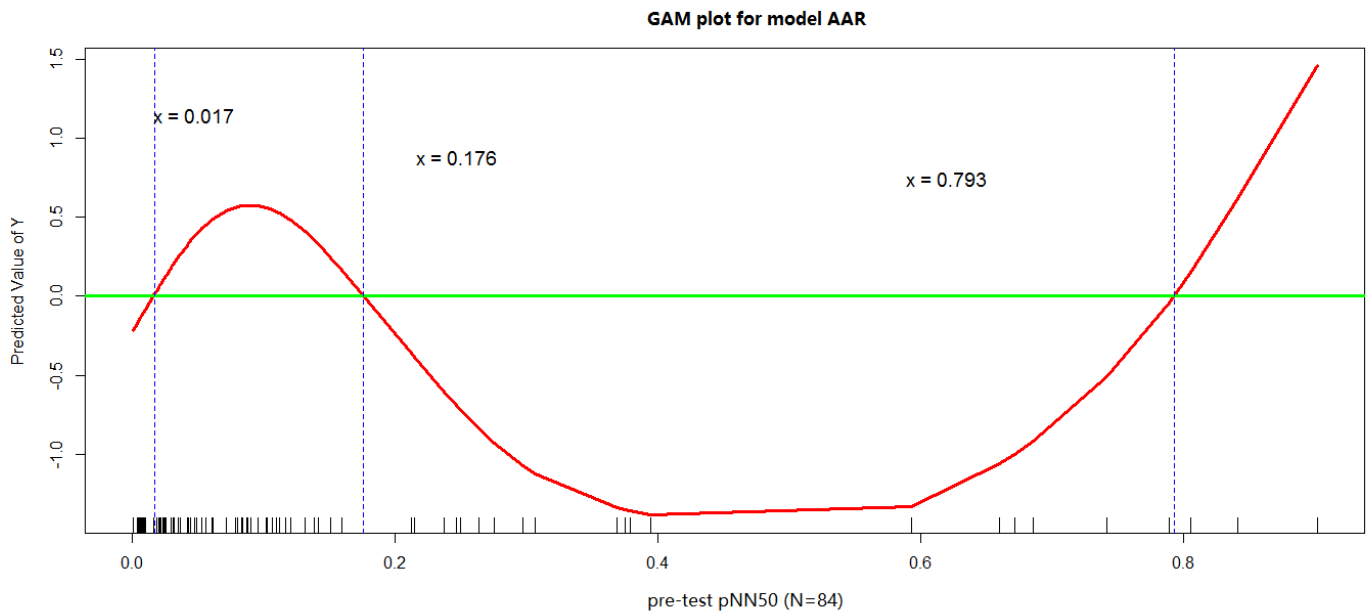

**Supplementary Figure S2: GAM plot for modeling the relationship between the change in the alpha wave and pretest pNN50.** The vertical axis represents the difference in alpha activity. The horizontal axis represents the pretest pNN50 and number of patients. GAM techniques can be used to show that

$$\text{pre-test pNN50} = \begin{cases} 1, & 0.017 \leq \text{pNN50} \leq 0.176 \\ 0, & \text{others} \end{cases}$$

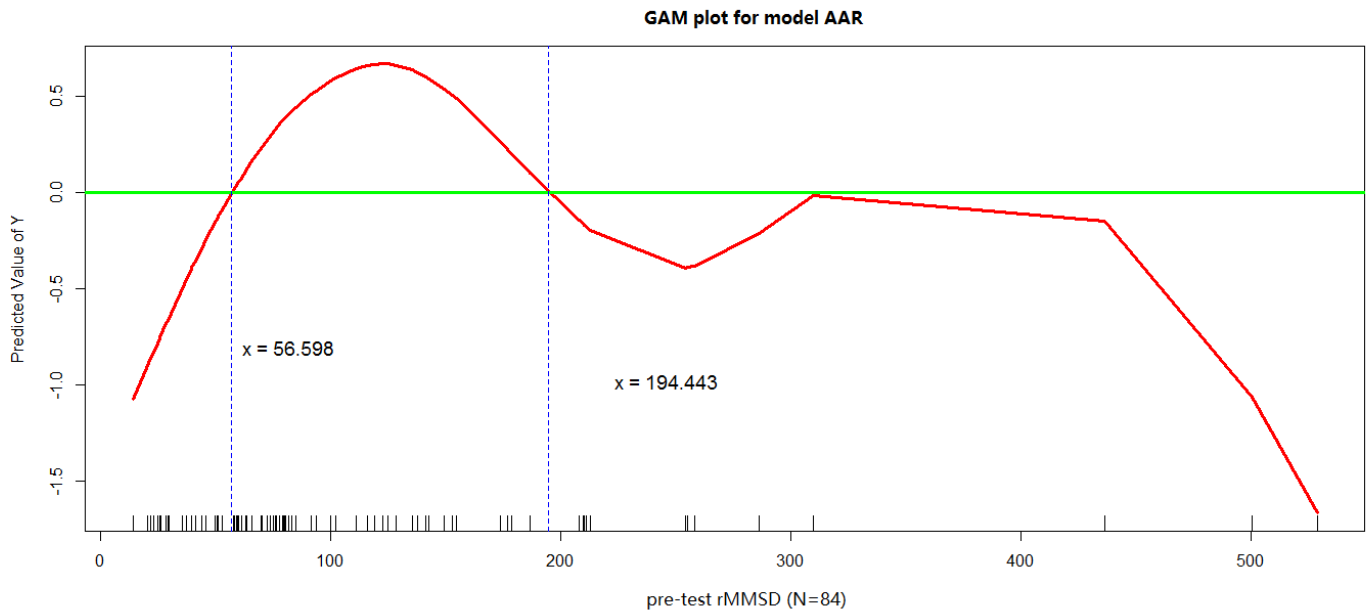

**Supplementary Figure S3: GAM plot for modeling the relationship between the change in the alpha wave and pretest rMMSD.** The vertical axis represents the difference in alpha activity. The horizontal axis represents the pretest rMMSD and number of patients. GAM techniques can be used to show that

$$\text{pre-test rMMSD} = \begin{cases} 1, & 56.598 \leq \text{rMMSD} \leq 194.443 \\ 0, & \text{others} \end{cases}$$

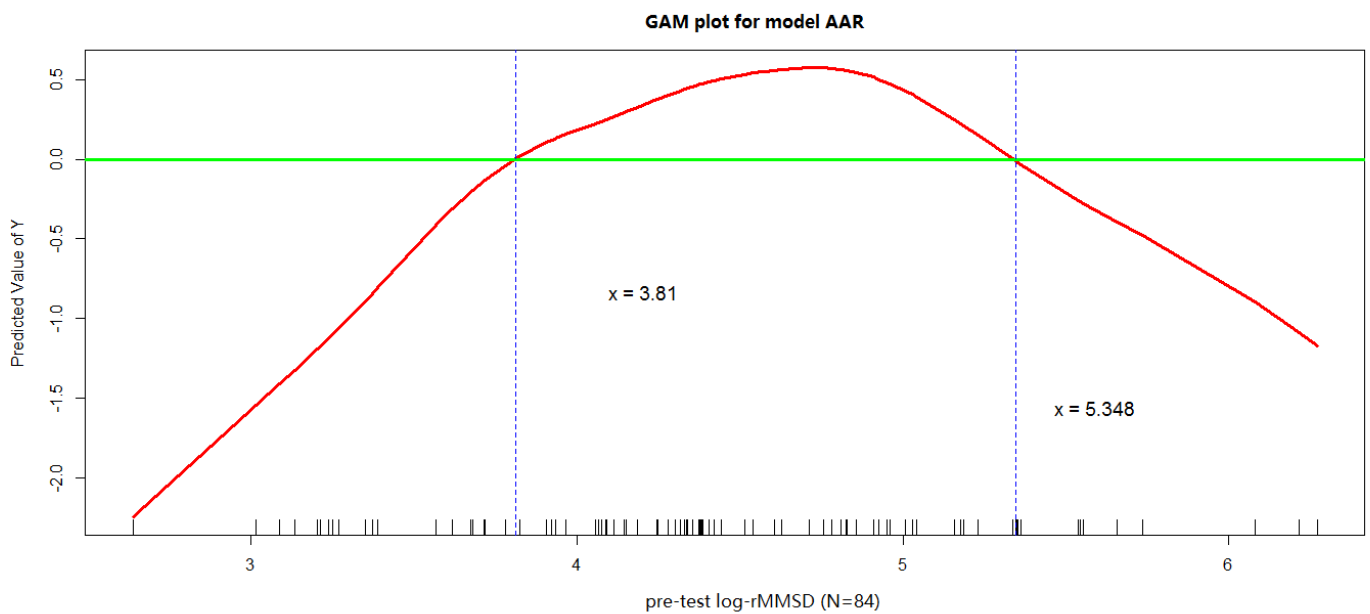

**Supplementary Figure S4: GAM plot for modeling the relationship between the change in the alpha wave and pretest log-rMMSD.** The vertical axis represents the difference in alpha activity. The horizontal axis represents the pretest log-rMMSD and number of patients. GAM techniques can be used to show that

$$\text{pre-test log-rMMSD} = \begin{cases} 1, & 3.81 \leq \text{log-rMMSD} \leq 5.348 \\ 0, & \text{others} \end{cases}$$

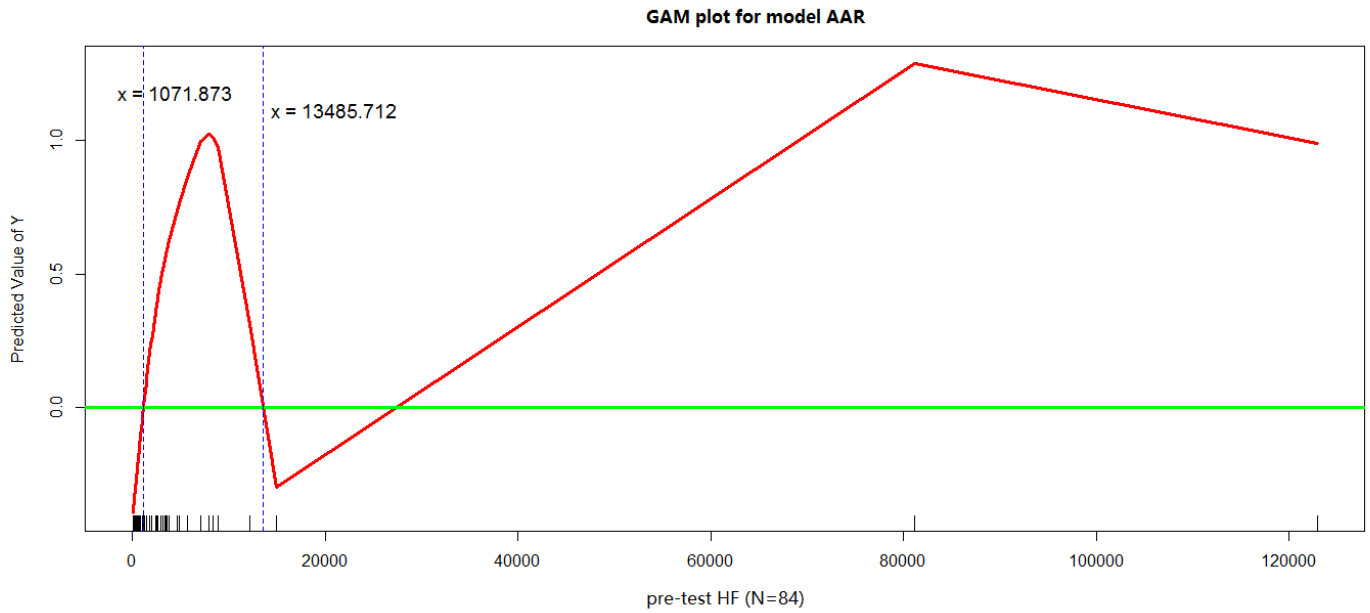

**Supplementary Figure S5: GAM plot for modeling the relationship between the change in the alpha wave and pretest HF.**

The vertical axis represents the difference in alpha activity. The horizontal axis represents the pretest HF and number of patients.

GAM techniques can be used to show that

$$\text{pre-test HF} = \begin{cases} 1, & 1071.873 \leq \text{HF} \leq 13485.712 \\ 0, & \text{others} \end{cases}$$

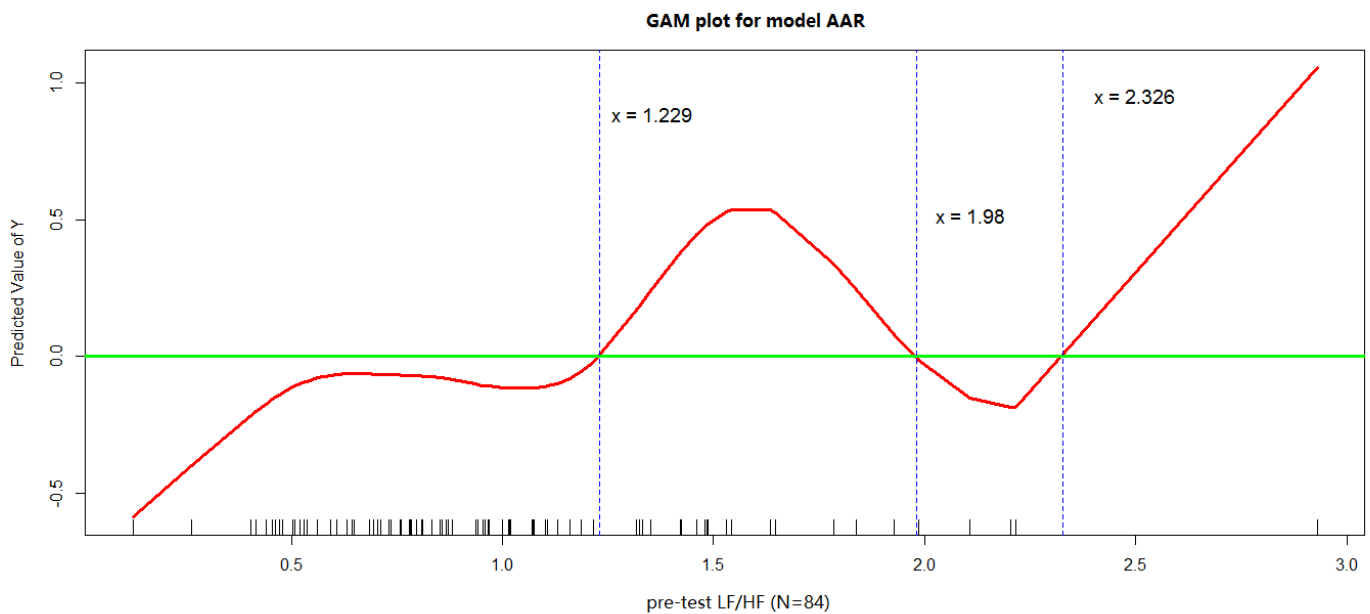

**Supplementary Figure S6: GAM plot for modeling the relationship between the change in the alpha wave and pretest LF/HF.**

The vertical axis represents the difference in alpha activity. The horizontal axis represents the pretest LF/HF and number of patients. GAM techniques can be used to show that

$$\text{pre-test LF/HF} = \begin{cases} 1, & 1.229 \leq \text{LF/HF} \leq 1.98 \\ 0, & \text{others} \end{cases}$$



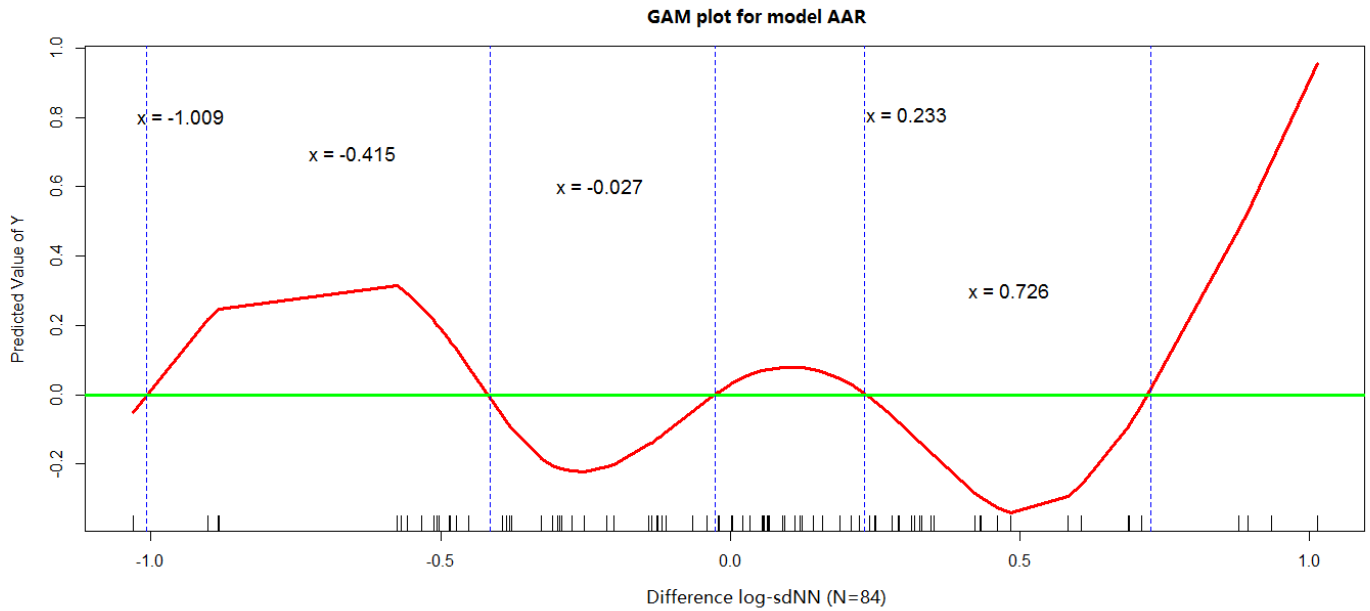

**Supplementary Figure S7: GAM plot for modeling the relationship between the change in the alpha wave and Difference log-sdNN.** The vertical axis represents the difference in alpha activity. The horizontal axis represents the Difference log-sdNN and number of patients. GAM techniques can be used to show that

$$\text{Difference log-sdNN} = \begin{cases} 1, & \text{log-sdNN} \leq -0.415 \\ 0, & \text{others} \end{cases}$$

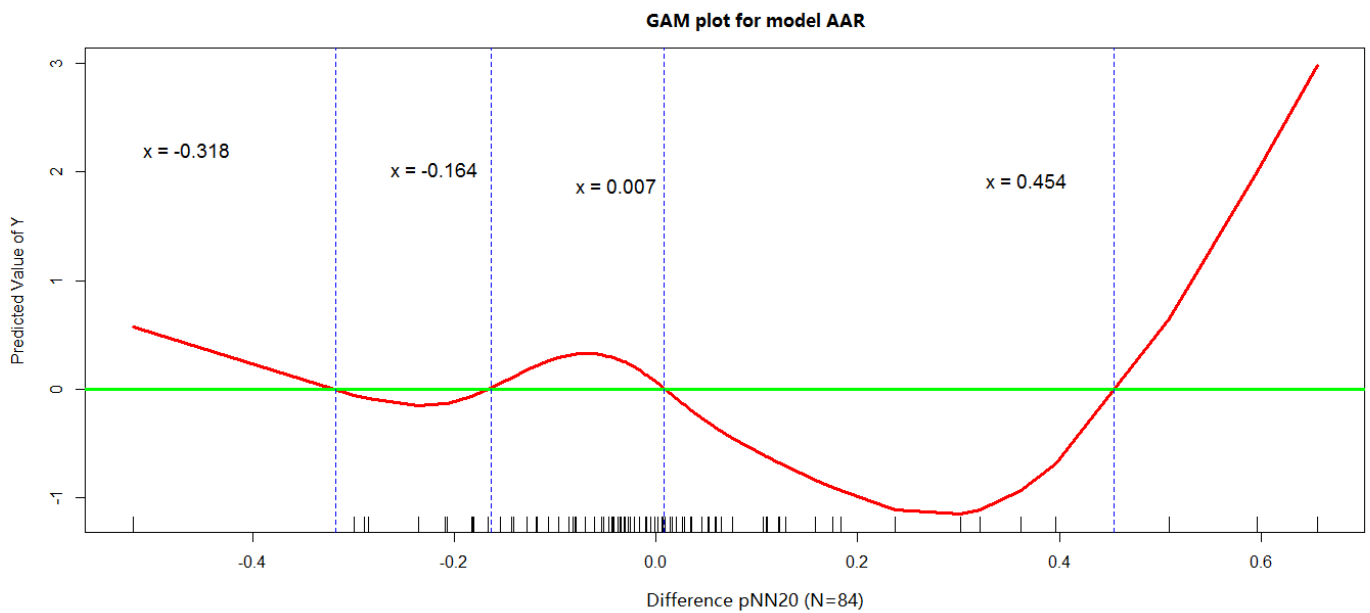

**Supplementary Figure S8: GAM plot for modeling the relationship between the change in the alpha wave and Difference pNN20.** The vertical axis represents the difference in alpha activity. The horizontal axis represents the Difference pNN20 and number of patients. GAM techniques can be used to show that

$$\text{Difference pNN20} = \begin{cases} 1, & -0.164 \leq \text{pNN20} \leq 0.007 \\ 0, & \text{others} \end{cases}$$

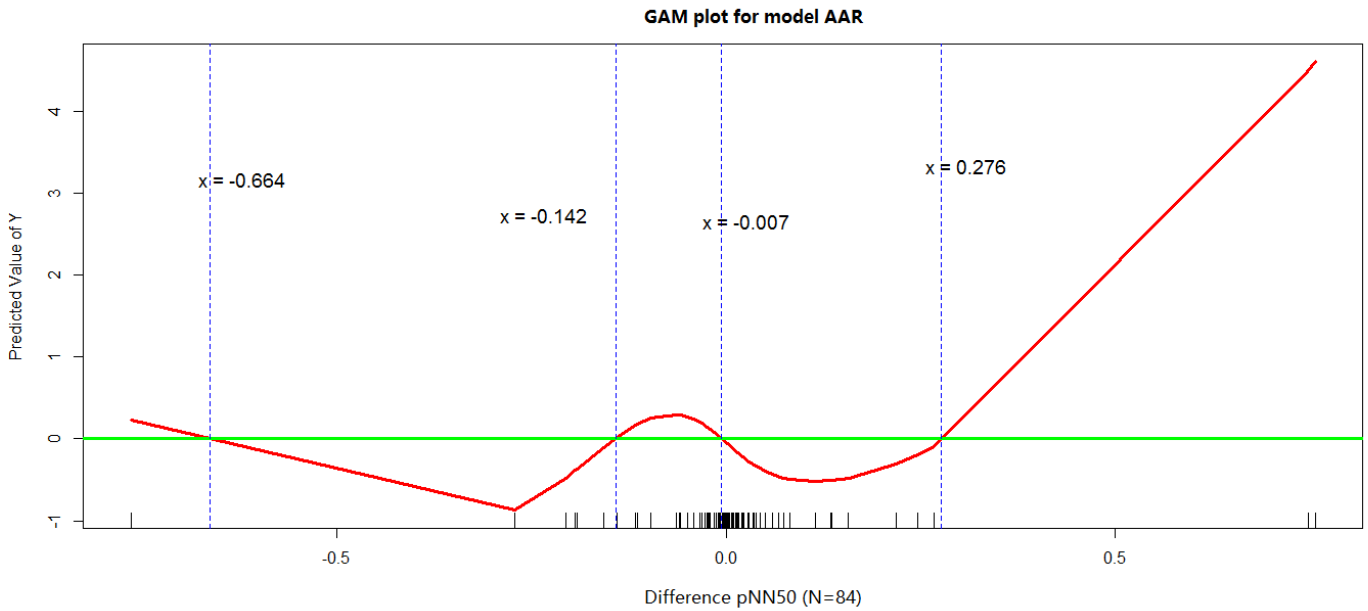

**Supplementary Figure S9: GAM plot for modeling the relationship between the change in the alpha wave and Difference pNN50.** The vertical axis represents the difference in alpha activity. The horizontal axis represents the Difference pNN50 and number of patients. GAM techniques can be used to show that

$$\text{Difference pNN50} = \begin{cases} 1, & -0.142 \leq \text{pNN50} \leq 0.007 \\ 0, & \text{others} \end{cases}$$

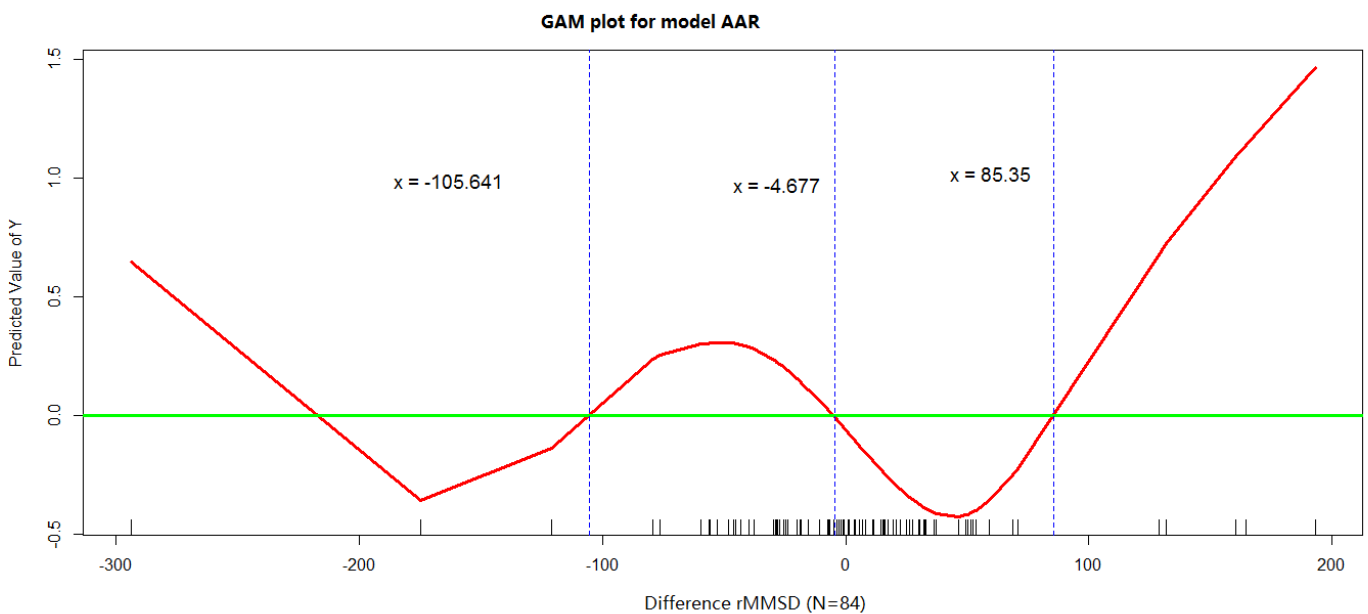

**Supplementary Figure S10: GAM plot for modeling the relationship between the change in the alpha wave and Difference rMMSD.** The vertical axis represents the difference in alpha activity. The horizontal axis represents the Difference rMMSD and number of patients. GAM techniques can be used to show that

$$\text{Difference rMMSD} = \begin{cases} 1, & -105.641 \leq \text{rMMSD} \leq 4.677 \\ 0, & \text{others} \end{cases}$$

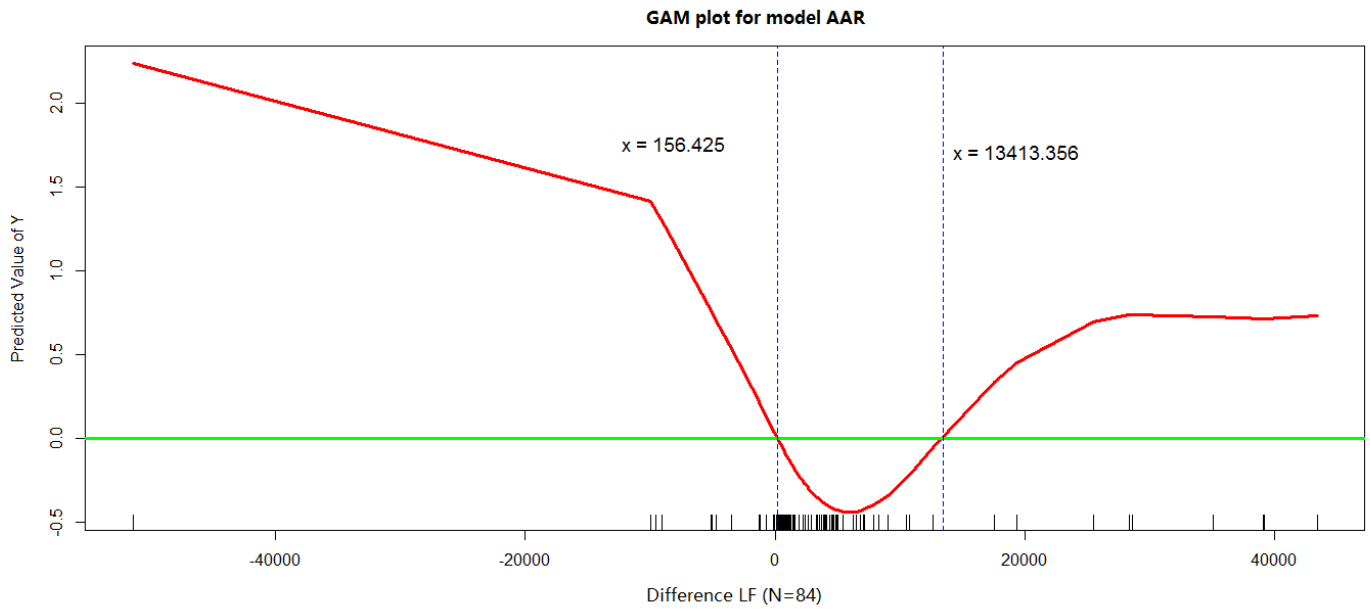

**Supplementary Figure S11: GAM plot for modeling the relationship between the change in the alpha wave and Difference LF.** The vertical axis represents the difference in alpha activity. The horizontal axis represents the Difference LF and number of patients. GAM techniques can be used to show that

$$\text{Difference LF} = \begin{cases} 1, & 156.425 \leq \text{LF} \leq 13413.356 \\ 0, & \text{others} \end{cases}$$

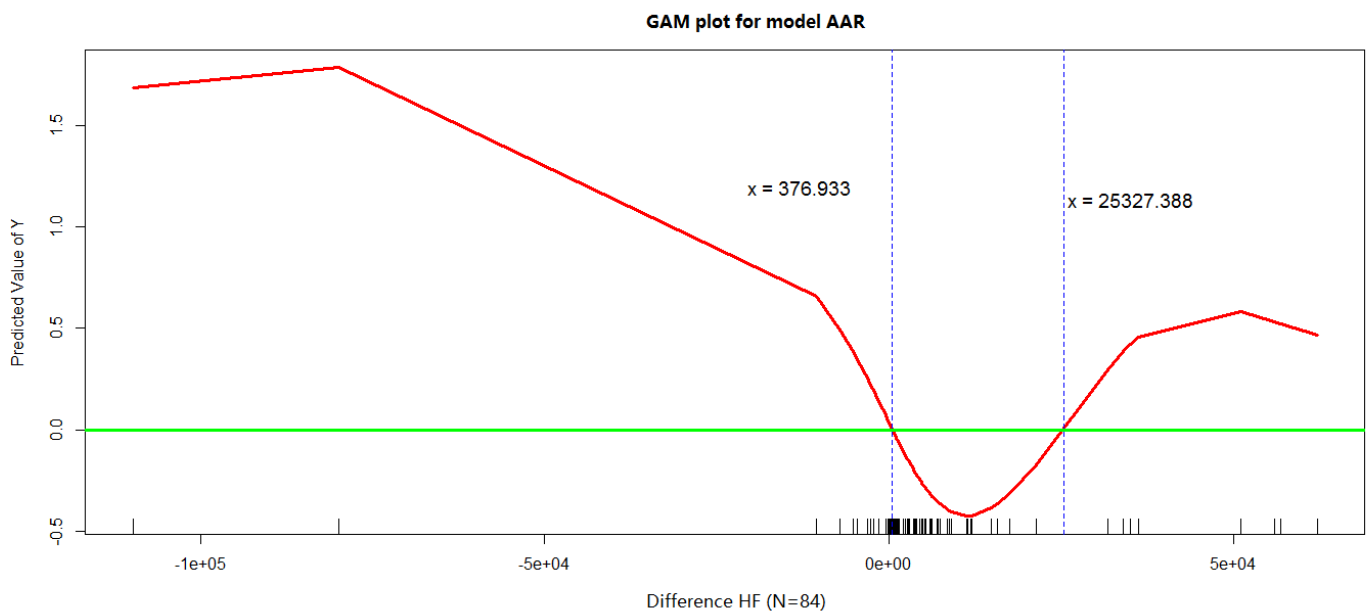

**Supplementary Figure S12: GAM plot for modeling the relationship between the change in the alpha wave and Difference HF.** The vertical axis represents the difference in alpha activity. The horizontal axis represents the Difference HF and number of patients. GAM techniques can be used to show that

$$\text{Difference HF} = \begin{cases} 1, & 376.933 \leq \text{HF} \leq 25327.388 \\ 0, & \text{others} \end{cases}$$

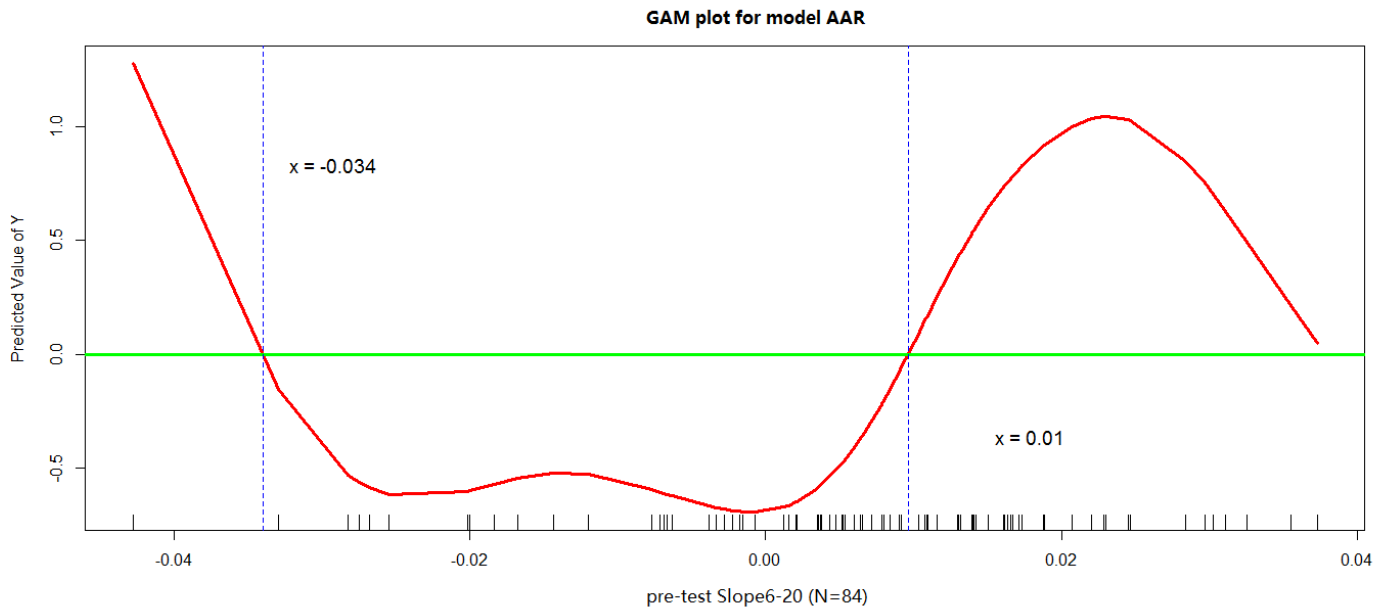

**Supplementary Figure S13: GAM plot for modeling the relationship between the change in the alpha wave and pre-test Slope6-20.** The vertical axis represents the difference in alpha activity. The horizontal axis represents the pretest Slope6-20 and number of patients. GAM techniques can be used to show that

$$\text{pre-test Slope6-20} = \begin{cases} 1, & 0.01 \leq \text{Slope6-20} \\ 0, & \text{others} \end{cases}$$

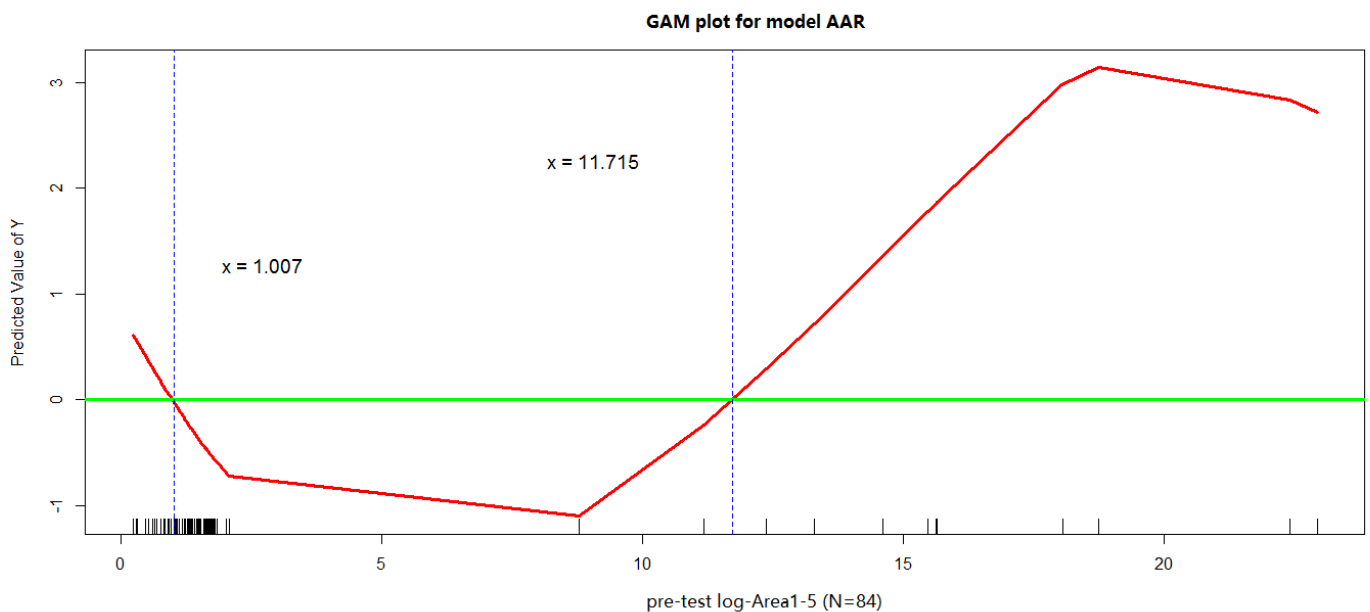

**Supplementary Figure S14: GAM plot for modeling the relationship between the change in the alpha wave and pre-test log-Area1-5.** The vertical axis represents the difference in alpha activity. The horizontal axis represents the pretest log-Area1-5 and number of patients. GAM techniques can be used to show that

$$\text{pre-test log-Area1-5} = \begin{cases} 1, & \text{log-Area1-5} \leq 1.007 \\ 0, & \text{others} \end{cases}$$

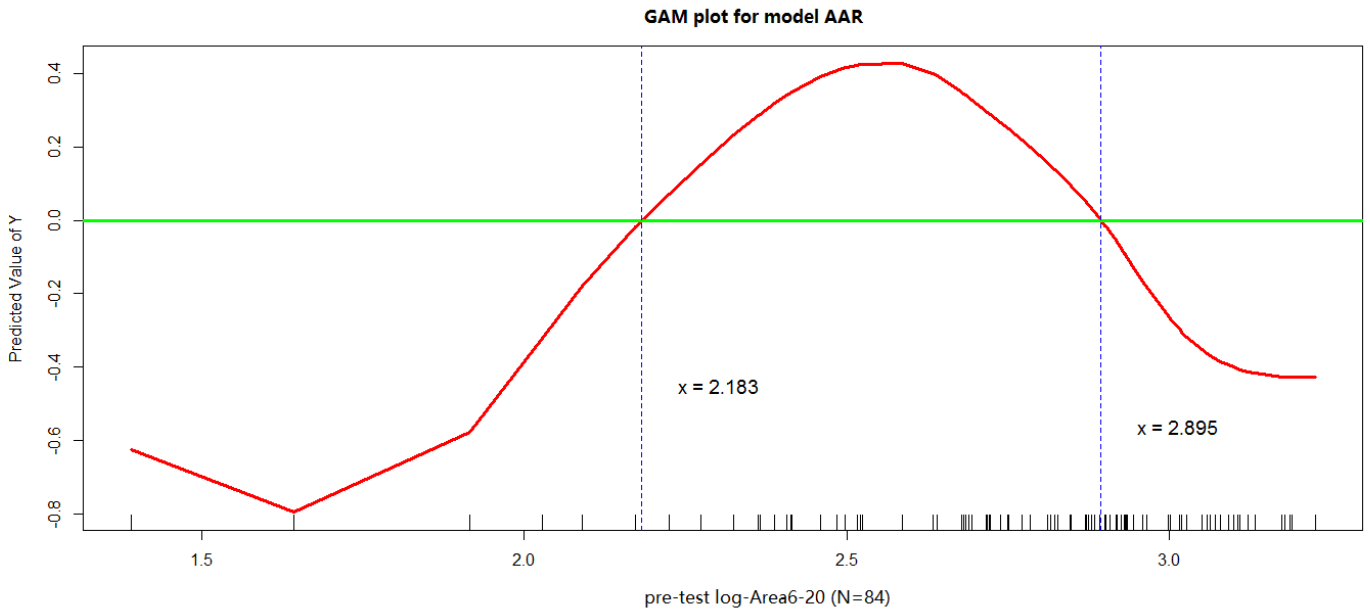

**Supplementary Figure S15: GAM plot for modeling the relationship between the change in the alpha wave and pre-test log-Area6-20.** The vertical axis represents the difference in alpha activity. The horizontal axis represents the pretest log-Area6-20 and number of patients. GAM techniques can be used to show that

$$\text{pre-test log-Area6-20} = \begin{cases} 1, & 2.183 \leq \log\text{-Area6-20} \leq 2.895 \\ 0, & \text{others} \end{cases}$$

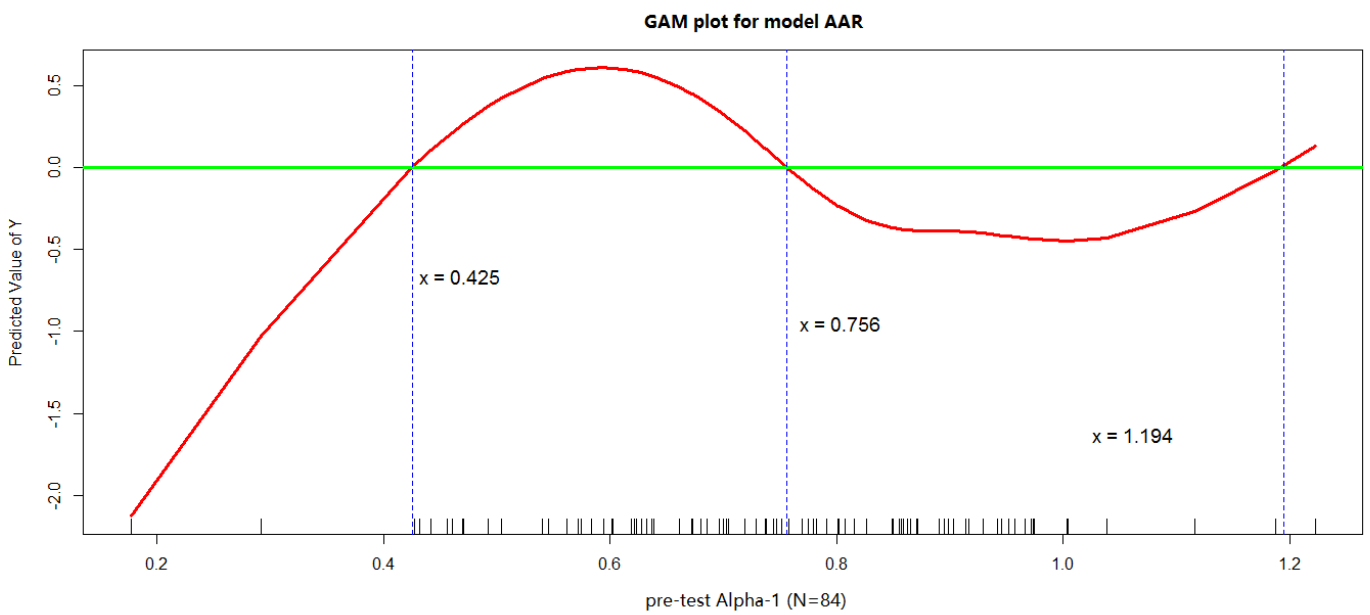

**Supplementary Figure S16: GAM plot for modeling the relationship between the change in the alpha wave and pre-test Alpha-1.** The vertical axis represents the difference in alpha activity. The horizontal axis represents the pretest Alpha-1 and number of patients. GAM techniques can be used to show that

$$\text{pre-test Alpha-1} = \begin{cases} 1, & 0.425 \leq \text{Alpha-1} \leq 0.756 \\ 0, & \text{others} \end{cases}$$

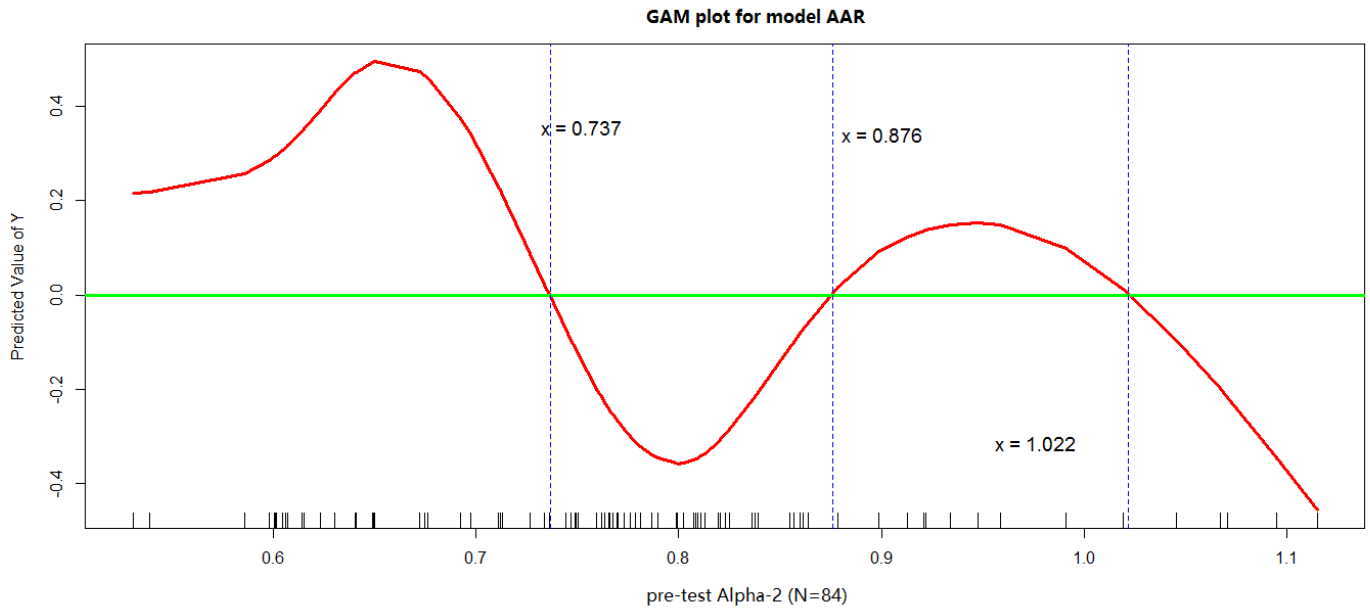

**Supplementary Figure S17: GAM plot for modeling the relationship between the change in the alpha wave and pre-test Alpha-2.** The vertical axis represents the difference in alpha activity. The horizontal axis represents the pretest Alpha-2 and number of patients. GAM techniques can be used to show that

$$\text{pre-test Alpha-2} = \begin{cases} 1, & \text{Alpha-2} \leq 0.737 \text{ and } \text{Alpha-2} \geq 0.876 \\ 0, & \text{others} \end{cases}$$

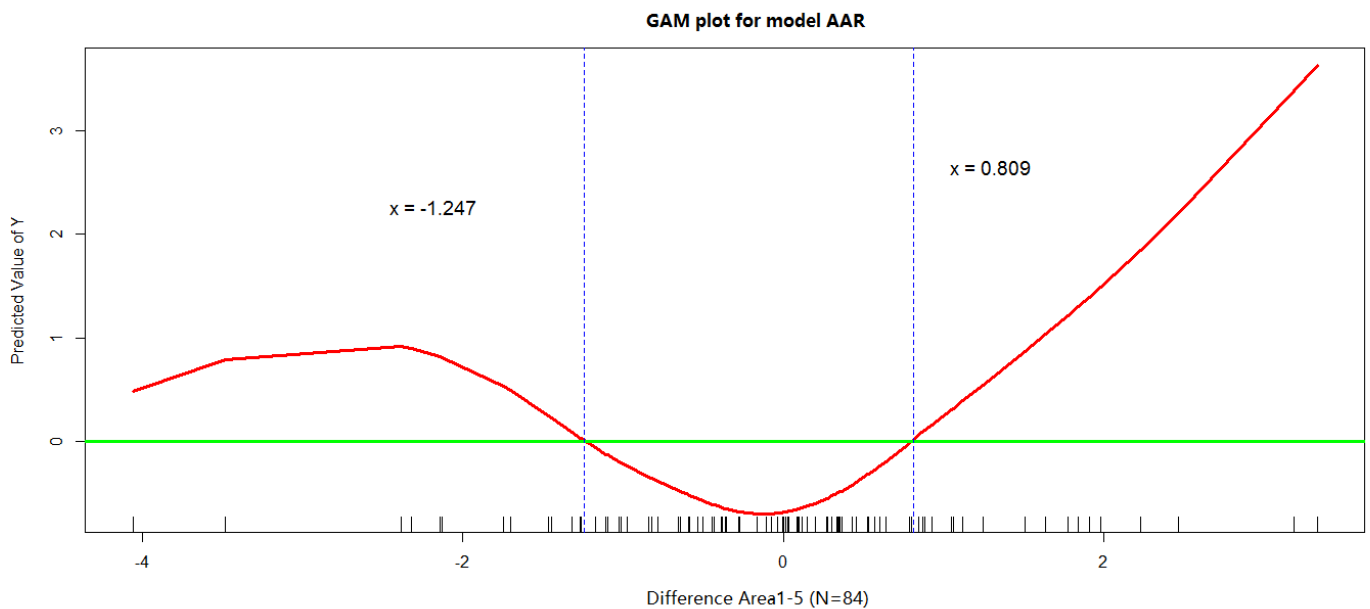

**Supplementary Figure S18: GAM plot for modeling the relationship between the change in the alpha wave and Difference Area1-5.** The vertical axis represents the difference in alpha activity. The horizontal axis represents the Difference Area1-5 and number of patients. GAM techniques can be used to show that

$$\text{Difference Area1-5} = \begin{cases} 1, & \text{Area1-5} \leq -1.247 \text{ and } \text{Area1-5} \geq 0.809 \\ 0, & \text{others} \end{cases}$$

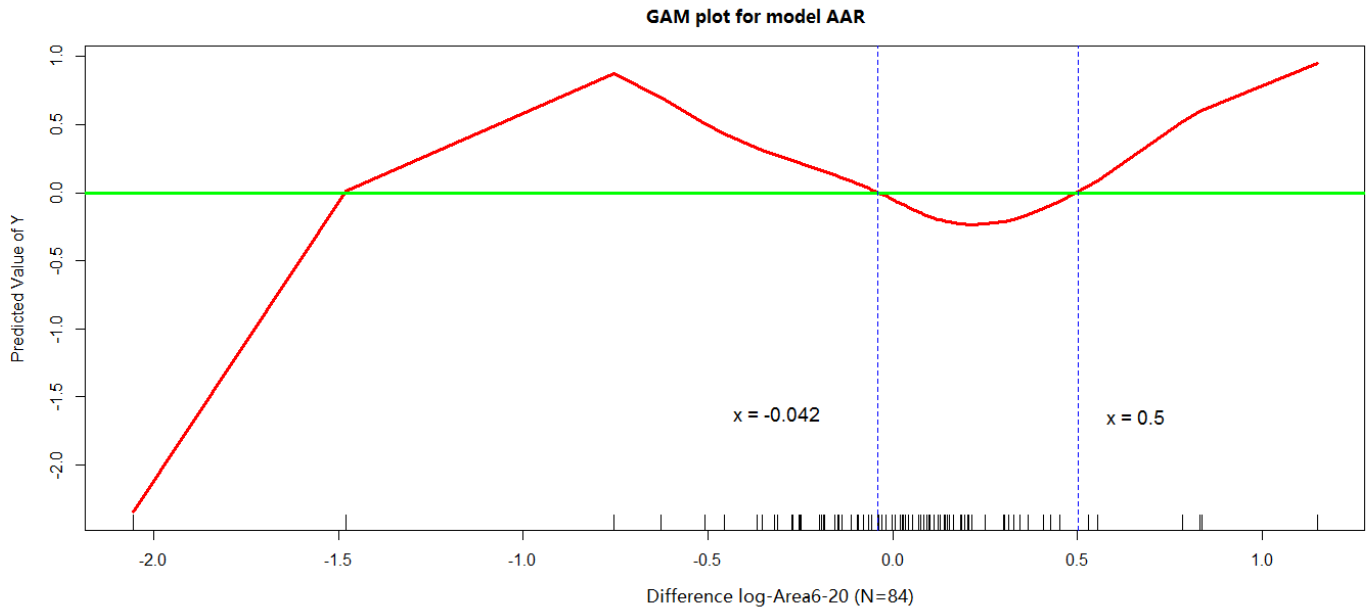

**Supplementary Figure S19: GAM plot for modeling the relationship between the change in the alpha wave and Difference log-Area6-20.** The vertical axis represents the difference in alpha activity. The horizontal axis represents the Difference log-Area6-20 and number of patients. GAM techniques can be used to show that

$$\text{Difference log-Area6-20} = \begin{cases} 1, & \text{Area6-20} \leq -0.042 \text{ and } \text{Area6-20} \geq 0.5 \\ 0, & \text{others} \end{cases}$$
